# Supplementary material
Source: PubMed Central journal article supplement (PMC5817773)
Supplement: tpmd170299.SD1.pdf [file tpmd170299.SD1.pdf]

SUPPLEMENTAL TABLE 1

Distribution of house types by wall and roof material and malaria prevalence by rapid diagnostic test in the southern Zambia study site from 2008 to 2012

| Wall material              | Roof material             | Participants, <i>n</i> (%) | Malaria prevalence, % |
|----------------------------|---------------------------|----------------------------|-----------------------|
| Fired brick/cement block   | Iron sheet/corrugated tin | 849 (29)                   | 1.4                   |
|                            | Grass                     | 1,825 (62)                 | 1.6                   |
|                            | Asbestos                  | 83 (3)                     | 0                     |
| Mud/grass                  | Iron sheet/corrugated tin | 11 (< 1)                   | 0                     |
|                            | Grass                     | 114 (4)                    | 8.8                   |
| Unfired brick              | Grass                     | 34 (1)                     | 0                     |
| Mud-and-pole/house of tins | Grass                     | 13 (< 1)                   | 0                     |
